# Supplementary material for: Characterization and Immunomodulatory Effects of Canine Adipose Tissue- and Bone Marrow-Derived Mesenchymal Stromal Cells
Source: PLoS One. 2016 Dec 1;11(12):e0167442. doi: 10.1371/journal.pone.0167442 (PMC5131977; doi:10.1371/journal.pone.0167442)
Supplement: S5 File — (CSV) [file pone.0167442.s005.csv]

line	src	trt	gene	ct	sd
1303	at	0	gapdh	15.92	0.01
1303	at	1	gapdh	19.76	0.00
1305	at	0	gapdh	16.27	0.01
1305	at	1	gapdh	21.57	0.02
1306	at	0	gapdh	17.16	0.02
1306	at	1	gapdh	31.91	0.19
1401	at	0	gapdh	16.65	0.06
1401	at	1	gapdh	21.29	0.00
1303	bm	0	gapdh	16.24	0.01
1303	bm	1	gapdh	17.99	0.01
1305	bm	0	gapdh	15.98	0.03
1305	bm	1	gapdh	17.31	0.01
1306	bm	0	gapdh	16.71	0.01
1306	bm	1	gapdh	19.16	0.02
1401	bm	0	gapdh	16.16	0.03
1401	bm	1	gapdh	20.04	0.00
1303	at	0	osp	31.12	0.36
1303	at	1	osp	29.39	0.04
1305	at	0	osp	31.32	0.23
1305	at	1	osp	33.49	0.26
1306	at	0	osp	32.03	0.12
1306	at	1	osp	37.64	1.38
1401	at	0	osp	32.90	0.17
1401	at	1	osp	35.07	0.38
1303	bm	0	osp	28.93	0.03
1303	bm	1	osp	28.21	0.01
1305	bm	0	osp	28.53	0.10
1305	bm	1	osp	28.78	0.03
1306	bm	0	osp	30.49	0.02
1306	bm	1	osp	29.35	0.10
1401	bm	0	osp	31.52	0.13
1401	bm	1	osp	32.47	0.27
1303	at	0	runx	22.36	0.04
1303	at	1	runx	25.49	0.05
1305	at	0	runx	23.67	0.01
1305	at	1	runx	26.67	0.01
1306	at	0	runx	24.76	0.05
1306	at	1	runx	34.55	0.43
1401	at	0	runx	24.04	0.03
1401	at	1	runx	25.38	0.10
1303	bm	0	runx	22.16	0.03
1303	bm	1	runx	23.01	0.07
1305	bm	0	runx	23.33	0.01
1305	bm	1	runx	21.00	0.07
1306	bm	0	runx	22.75	0.02
1306	bm	1	runx	22.94	0.01
1401	bm	0	runx	23.15	0.01
1401	bm	1	runx	22.65	0.02
1303	at	0	col10a	14.30	0.03
1303	at	1	col10a	17.26	0.06
1305	at	0	col10a	14.56	0.04
1305	at	1	col10a	18.12	0.05
1306	at	0	col10a	15.96	0.02
1306	at	1	col10a	35.18	0.59
1401	at	0	col10a	15.37	0.01
1401	at	1	col10a	19.04	0.07
1303	bm	0	col10a	17.15	0.04
1303	bm	1	col10a	16.47	0.04
1305	bm	0	col10a	16.65	0.06
1305	bm	1	col10a	15.53	0.01
1306	bm	0	col10a	16.67	0.01
1306	bm	1	col10a	18.73	0.00
1401	bm	0	col10a	16.40	0.01
1401	bm	1	col10a	20.47	0.02
1303	at	0	alp	32.11	0.11
1303	at	1	alp	29.31	0.23
1305	at	0	alp	31.85	0.07
1305	at	1	alp	33.27	0.48
1306	at	0	alp	33.32	0.04
1306	at	1	alp	34.22	0.67
1401	at	0	alp	31.54	0.03
1401	at	1	alp	33.60	0.45
1303	bm	0	alp	30.72	0.06
1303	bm	1	alp	32.31	0.05
1305	bm	0	alp	27.55	0.13
1305	bm	1	alp	29.02	0.13
1306	bm	0	alp	31.99	0.17
1306	bm	1	alp	32.70	0.48
1401	bm	0	alp	31.59	0.27
1401	bm	1	alp	31.45	0.27
1303	at	0	bsp	32.80	0.19
1303	at	1	bsp	28.86	0.15
1305	at	0	bsp	33.96	0.95
1305	at	1	bsp	34.96	0.33
1306	at	0	bsp	33.46	0.83
1306	at	1	bsp	35.58	0.13
1401	at	0	bsp	34.02	0.51
1401	at	1	bsp	35.69	0.37
1303	bm	0	bsp	31.29	0.19
1303	bm	1	bsp	34.84	0.39
1305	bm	0	bsp	26.79	0.12
1305	bm	1	bsp	29.76	0.53
1306	bm	0	bsp	33.29	0.97
1306	bm	1	bsp	34.85	0.77
1401	bm	0	bsp	31.99	0.32
1401	bm	1	bsp	35.07	0.39
